# Supplementary material for: Impact of methylations of m2G966/m5C967 in 16S rRNA on bacterial fitness and translation initiation
Source: PubMed Central journal article supplement — Nucleic Acids Res. 2012 May 30;40(16):7885–95. doi: 10.1093/nar/gks508 (PMC3439901; doi:10.1093/nar/gks508), 2012-05-30
Supplement: supp_gks508_nar-00653-r-2012-File007.pdf [file supp_gks508_nar-00653-r-2012-File007.pdf]

## Supplementary Data

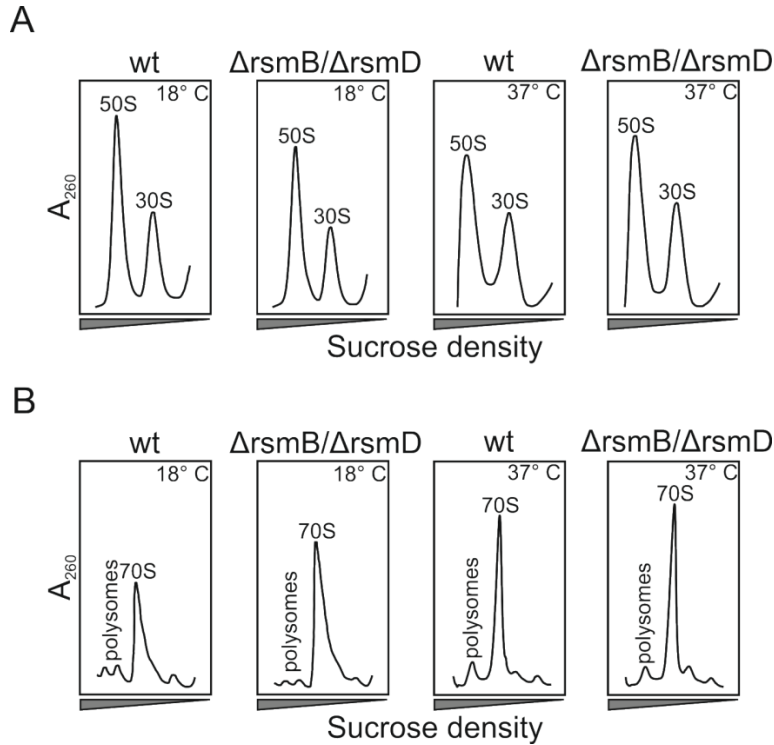

Supplementary Figure 1. (A) Analysis of the ribosomal subunits by sucrose density centrifugations of cell lysates at conditions of ribosome dissociation (1 mM  $Mg^{2+}$ ). (B) Ribosome profiles at conditions when 70S ribosomes remain associated (12 mM  $Mg^{2+}$ ).

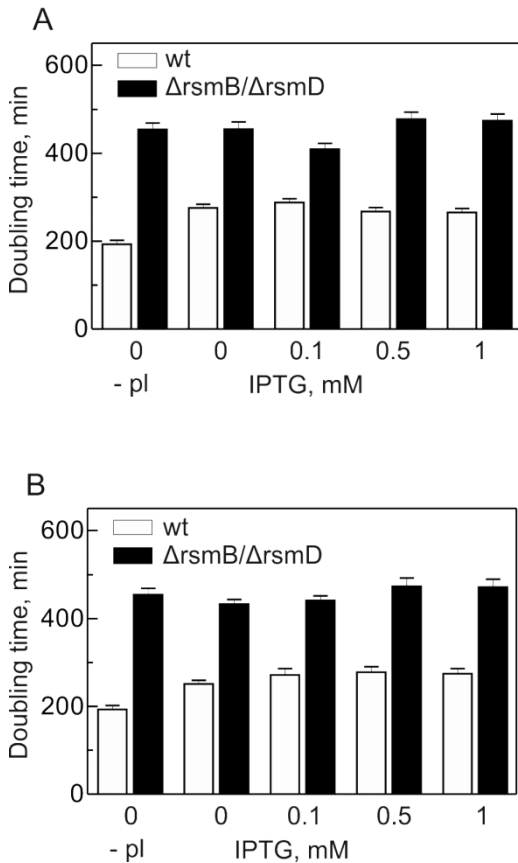

Supplementary Figure 2. (A) Growth rates upon IF1 overexpression at cold-shock conditions (18°C). “-pl” denotes a control without the IF1-coding plasmid. (B) Growth rates upon IF3 overexpression at cold-shock conditions (18°C). “-pl”, control without IF3-coding plasmid.
